# Supplementary material for: Identifying Patients with Nonalcoholic Fatty Liver Disease in Primary Care: How and for What Benefit?
Source: MDPI journal article supplement (doi:10.3390/jcm12124001), 2023-06-12
Supplement: s1 [file s1]

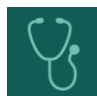

## Supplementary Materials

Table S1. Cutoff values for fibrosis assessments.

|       | Low Risk<br>for<br>Advanced<br>Fibrosis | Indeterminate<br>Risk for<br>Advanced<br>Fibrosis | High Risk<br>for<br>Advanced<br>Fibrosis | Reference                                                                                                                                                                                                                                                                                                                                                                                                                                                                                                                                                                                                                                                                                                  |
|-------|-----------------------------------------|---------------------------------------------------|------------------------------------------|------------------------------------------------------------------------------------------------------------------------------------------------------------------------------------------------------------------------------------------------------------------------------------------------------------------------------------------------------------------------------------------------------------------------------------------------------------------------------------------------------------------------------------------------------------------------------------------------------------------------------------------------------------------------------------------------------------|
| Fib-4 | <1.3                                    | 1.3–2.67                                          | >2.67                                    | Kanwal, F.; Shubrook, J.H.; Adams, L.A.; et al. Clinical care pathway for the risk stratification and management of patients with nonalcoholic fatty liver disease. <i>Gastroenterology</i> 2021, 161, 1657–1669 [1].                                                                                                                                                                                                                                                                                                                                                                                                                                                                                      |
|       | ≤1.3                                    | 1.3–3.25                                          | >3.25                                    | Newsome, P.N.; Cramb, R.; Davison, S.M.; et al. Guidelines on the management of abnormal liver blood tests. <i>Gut</i> 2018, 67, 6–19 [2].                                                                                                                                                                                                                                                                                                                                                                                                                                                                                                                                                                 |
|       | ≤2.67                                   | ≤2.67                                             | >2.67                                    | National Institute for Health and Care Excellence. How should I assess a person with NAFLD? Available online (accessible only in the UK): <a href="https://cks.nice.org.uk/topics/non-alcoholic-fatty-liver-disease-naflD/diagnosis/assessment/#:~:text=Fibrosis%20%28FIB%29-4%20Score%20%28FIB-4%29%20%E2%80%94%20a%20score%20of,a%20hepatology%20specialist%20for%20further%20assessment%20and%20management">https://cks.nice.org.uk/topics/non-alcoholic-fatty-liver-disease-naflD/diagnosis/assessment/#:~:text=Fibrosis%20%28FIB%29-4%20Score%20%28FIB-4%29%20%E2%80%94%20a%20score%20of,a%20hepatology%20specialist%20for%20further%20assessment%20and%20management</a> (accessed 3 April 2023) [3]. |
|       | <1.6                                    | 1.6–3.6                                           | >3.6                                     | Kim, B.K.; Kim, D.Y.; Park, J.Y.; et al. Validation of FIB-4 and comparison with other simple noninvasive indices for predicting liver fibrosis and cirrhosis in hepatitis B virus-infected patients. <i>Liver Int.</i> 2010, 30, 546–553 [4].                                                                                                                                                                                                                                                                                                                                                                                                                                                             |
| NFS   | ≤−1.455                                 | −1.455–0.675                                      | >0.675                                   | Newsome, P.N.; Cramb, R.; Davison, S.M.; et al. Guidelines on the management of abnormal liver blood tests. <i>Gut</i> 2018, 67, 6–19 [2].                                                                                                                                                                                                                                                                                                                                                                                                                                                                                                                                                                 |
|       | <−1.455                                 | −1.455–0.676                                      | >0.676                                   | Angulo, P.; Hui, J.M.; Marchesini, G.; et al. The NAFLD fibrosis score: a noninvasive system that identifies liver fibrosis in patients with NAFLD. <i>Hepatology</i> 2007, 45, 846–854 [5].                                                                                                                                                                                                                                                                                                                                                                                                                                                                                                               |
|       | ≤−1.455                                 | >−1.455                                           | >−1.455                                  | National Institute for Health and Care Excellence. How should I assess a person with NAFLD? Available online: <a href="https://cks.nice.org.uk/topics/non-alcoholic-fatty-liver-disease-naflD/diagnosis/assessment/#:~:text=Fibrosis%20%28FIB%29-4%20Score%20%28FIB-4%29%20%E2%80%94%20a%20score%20of,a%20hepatology%20specialist%20for%20further%20assessment%20and%20management">https://cks.nice.org.uk/topics/non-alcoholic-fatty-liver-disease-naflD/diagnosis/assessment/#:~:text=Fibrosis%20%28FIB%29-4%20Score%20%28FIB-4%29%20%E2%80%94%20a%20score%20of,a%20hepatology%20specialist%20for%20further%20assessment%20and%20management</a> (accessed 3 April 2023) [3].                             |
| ELF™  | ≤9.5                                    |                                                   | >9.5                                     | Newsome, P.N.; Cramb, R.; Davison, S.M.; et al. Guidelines on the management of abnormal liver blood tests. <i>Gut</i> 2018, 67, 6–19 [2].                                                                                                                                                                                                                                                                                                                                                                                                                                                                                                                                                                 |
|       | <10.5                                   | <10.5                                             | ≥10.51                                   | National Institute for Health and Care Excellence. How should I assess a person with NAFLD? Available online: <a href="https://cks.nice.org.uk/topics/non-alcoholic-fatty-liver-disease-naflD/diagnosis/assessment/#:~:text=Fibrosis%20%28FIB%29-4%20Score%20%28FIB-4%29%20%E2%80%94%20a%20score%20of,a%20hepatology%20specialist%20for%20further%20assessment%20and%20management">https://cks.nice.org.uk/topics/non-alcoholic-fatty-liver-disease-naflD/diagnosis/assessment/#:~:text=Fibrosis%20%28FIB%29-4%20Score%20%28FIB-4%29%20%E2%80%94%20a%20score%20of,a%20hepatology%20specialist%20for%20further%20assessment%20and%20management</a> (accessed 3 April 2023) [3].                             |
|       | <7.7                                    | ≥7.7–<9.8                                         | ≥9.8                                     | Siemens Healthineers. The enhanced liver fibrosis (ELF) blood test: literature compendium volume 1. Available online: <a href="https://www.siemens-healthineers.com/en-uk/laboratory-diagnostics/assays-by-diseases-conditions/liver-disease/elf-test">https://www.siemens-healthineers.com/en-uk/laboratory-diagnostics/assays-by-diseases-conditions/liver-disease/elf-test</a> (accessed 3 April 2023) [6].                                                                                                                                                                                                                                                                                             |
| VCTE  | <8 kPa                                  | 8–12 kPa                                          | >12 kPa                                  | Kanwal, F.; Shubrook, J.H.; Adams, L.A.; et al. Clinical care pathway for the risk stratification and management of patients with nonalcoholic fatty liver disease. <i>Gastroenterology</i> 2021, 161, 1657–1669 [1].                                                                                                                                                                                                                                                                                                                                                                                                                                                                                      |
|       | ≤8.2 kPa <sup>a</sup>                   |                                                   | >8.2 kPa <sup>a</sup>                    | Eddowes, P.J.; Sasso, M.; Allison, M.; et al. Accuracy of FibroScan controlled attenuation parameter and liver stiffness measurement in assessing steatosis and fibrosis in patients with nonalcoholic fatty liver disease. <i>Gastroenterology</i> 2019, 156, 1717–1730 [7].                                                                                                                                                                                                                                                                                                                                                                                                                              |

|          |                          |                                                                                                                                            |
|----------|--------------------------|--------------------------------------------------------------------------------------------------------------------------------------------|
| ≤7.8 kPa | >7.8 kPa or invalid scan | Newsome, P.N.; Cramb, R.; Davison, S.M.; et al. Guidelines on the management of abnormal liver blood tests. <i>Gut</i> 2018, 67, 6–19 [2]. |
|----------|--------------------------|--------------------------------------------------------------------------------------------------------------------------------------------|

<sup>a</sup> Youden's index cutoff value of >8.2 kPa is the threshold for ≥fibrosis stage 2, representing clinically significant fibrosis. ELF<sup>TM</sup>, enhanced liver fibrosis; Fib-4, Fibrosis-4; NFS, NAFLD fibrosis score; VCTE, vibration controlled transient elastography.

## References

1. Kanwal, F.; Shubbrook, J.H.; Adams, L.A.; Pfothenhauer, K.; Wong, V.W.; Wright, E.; Abdelmalek, M.F.; Harrison, S.A.; Loomba, R.; Mantzoros, C.S.; et al. Clinical care pathway for the risk stratification and management of patients with nonalcoholic fatty liver disease. *Gastroenterology* **2021**, 161, 1657–1669. <https://doi.org/10.1053/j.gastro.2021.07.049>.
2. Newsome, P.N.; Cramb, R.; Davison, S.M.; Dillon, J.F.; Foulerton, M.; Godfrey, E.M.; Hall, R.; Harrower, U.; Hudson, M.; Langford, A.; et al. Guidelines on the management of abnormal liver blood tests. *Gut* **2018**, 67, 6–19. <https://doi.org/10.1136/gutjnl-2017-314924>.
3. National Institute for Health and Care Excellence. How should I assess a person with NAFLD? Available online (accessible only in the UK): <https://cks.nice.org.uk/topics/non-alcoholic-fatty-liver-disease-naflD/diagnosis/assessment/#:~:text=Fibrosis%20%28FIB%29-4%20Score%20%28FIB-4%29%20%E2%80%94%20a%20score%20of,a%20hepatology%20specialist%20for%20further%20assessment%20and%20management> (accessed 3 April 2023).
4. Kim, B.K.; Kim, D.Y.; Park, J.Y.; Ahn, S.H.; Chon, C.Y.; Kim, J.K.; Paik, Y.H.; Lee, K.S.; Park, Y.N.; Han, K.H. Validation of FIB-4 and comparison with other simple noninvasive indices for predicting liver fibrosis and cirrhosis in hepatitis B virus-infected patients. *Liver Int* **2010**, 30, 546–553. <https://doi.org/10.1111/j.1478-3231.2009.02192.x>.
5. Angulo, P.; Hui, J.M.; Marchesini, G.; Bugianesi, E.; George, J.; Farrell, G.C.; Enders, F.; Saksena, S.; Burt, A.D.; Bida, J.P.; et al. The NAFLD fibrosis score: A noninvasive system that identifies liver fibrosis in patients with NAFLD. *Hepatology* **2007**, 45, 846–854. <https://doi.org/10.1002/hep.21496>.
6. Siemens Healthineers. The enhanced liver fibrosis (ELF) blood test: Literature compendium volume 1. Available online: <https://www.siemens-healthineers.com/en-uk/laboratory-diagnostics/assays-by-diseases-conditions/liver-disease/elf-test> (accessed 3 April 2023).
7. Eddowes, P.J.; Sasso, M.; Allison, M.; Tsochatzis, E.; Anstee, Q.M.; Sheridan, D.; Guha, I.N.; Cobbald, J.F.; Deeks, J.J.; Paradis, V.; et al. Accuracy of FibroScan controlled attenuation parameter and liver stiffness measurement in assessing steatosis and fibrosis in patients with nonalcoholic fatty liver disease. *Gastroenterology* **2019**, 156, 1717–1730. <https://doi.org/10.1053/j.gastro.2019.01.042>.
